# Supplementary material for: Novel meso-substituted trans-A2B2 porphyrins: synthesis and structure of their metal-mediated supramolecular assemblies
Source: Royal Society of Chemistry journal article supplement (doi:10.1039/c7ce01642e), 2017-01-01
Supplement: c7ce01642e1.pdf [file c7ce01642e1.pdf]

## Supporting Information File

### **Novel *meso*-substituted *trans*-A<sub>2</sub>B<sub>2</sub> porphyrins: Synthesis and structure of their metal-mediated supramolecular assemblies**

Soumyabrata Goswami,<sup>a</sup> Bharat Kumar Tripuramallu<sup>a,b</sup> and Israel Goldberg\*<sup>a</sup>

<sup>a</sup>*School of Chemistry, Sackler Faculty of Exact Sciences, Tel-Aviv University, Ramat-Aviv, 69978 Tel-Aviv, Israel; E-mails: sgoswami423@gmail.com, goldberg@post.tau.ac.il*

<sup>b</sup>*Chemistry Division, Department of Sciences and Humanities, VFSTR University, Vadlamudi, Guntur 522213, Andhra Pradesh, India.*

#### List of Contents

| <b>Details</b>                                    | <b>Figure/Table No.</b> | <b>Page No.</b> |
|---------------------------------------------------|-------------------------|-----------------|
| NMR spectra ( <sup>1</sup> H and <sup>13</sup> C) | Fig. S1 – Fig. S5       | 2-6             |
| Mass spectra                                      | Fig. S6 – Fig. 10       | 7-11            |
| Emission spectra                                  | Fig. S11                | 12              |
| Structural Illustrations                          | Fig. S12-S16            | 12-14           |
| SHAPE Analysis Table                              | Table S1                | 15              |

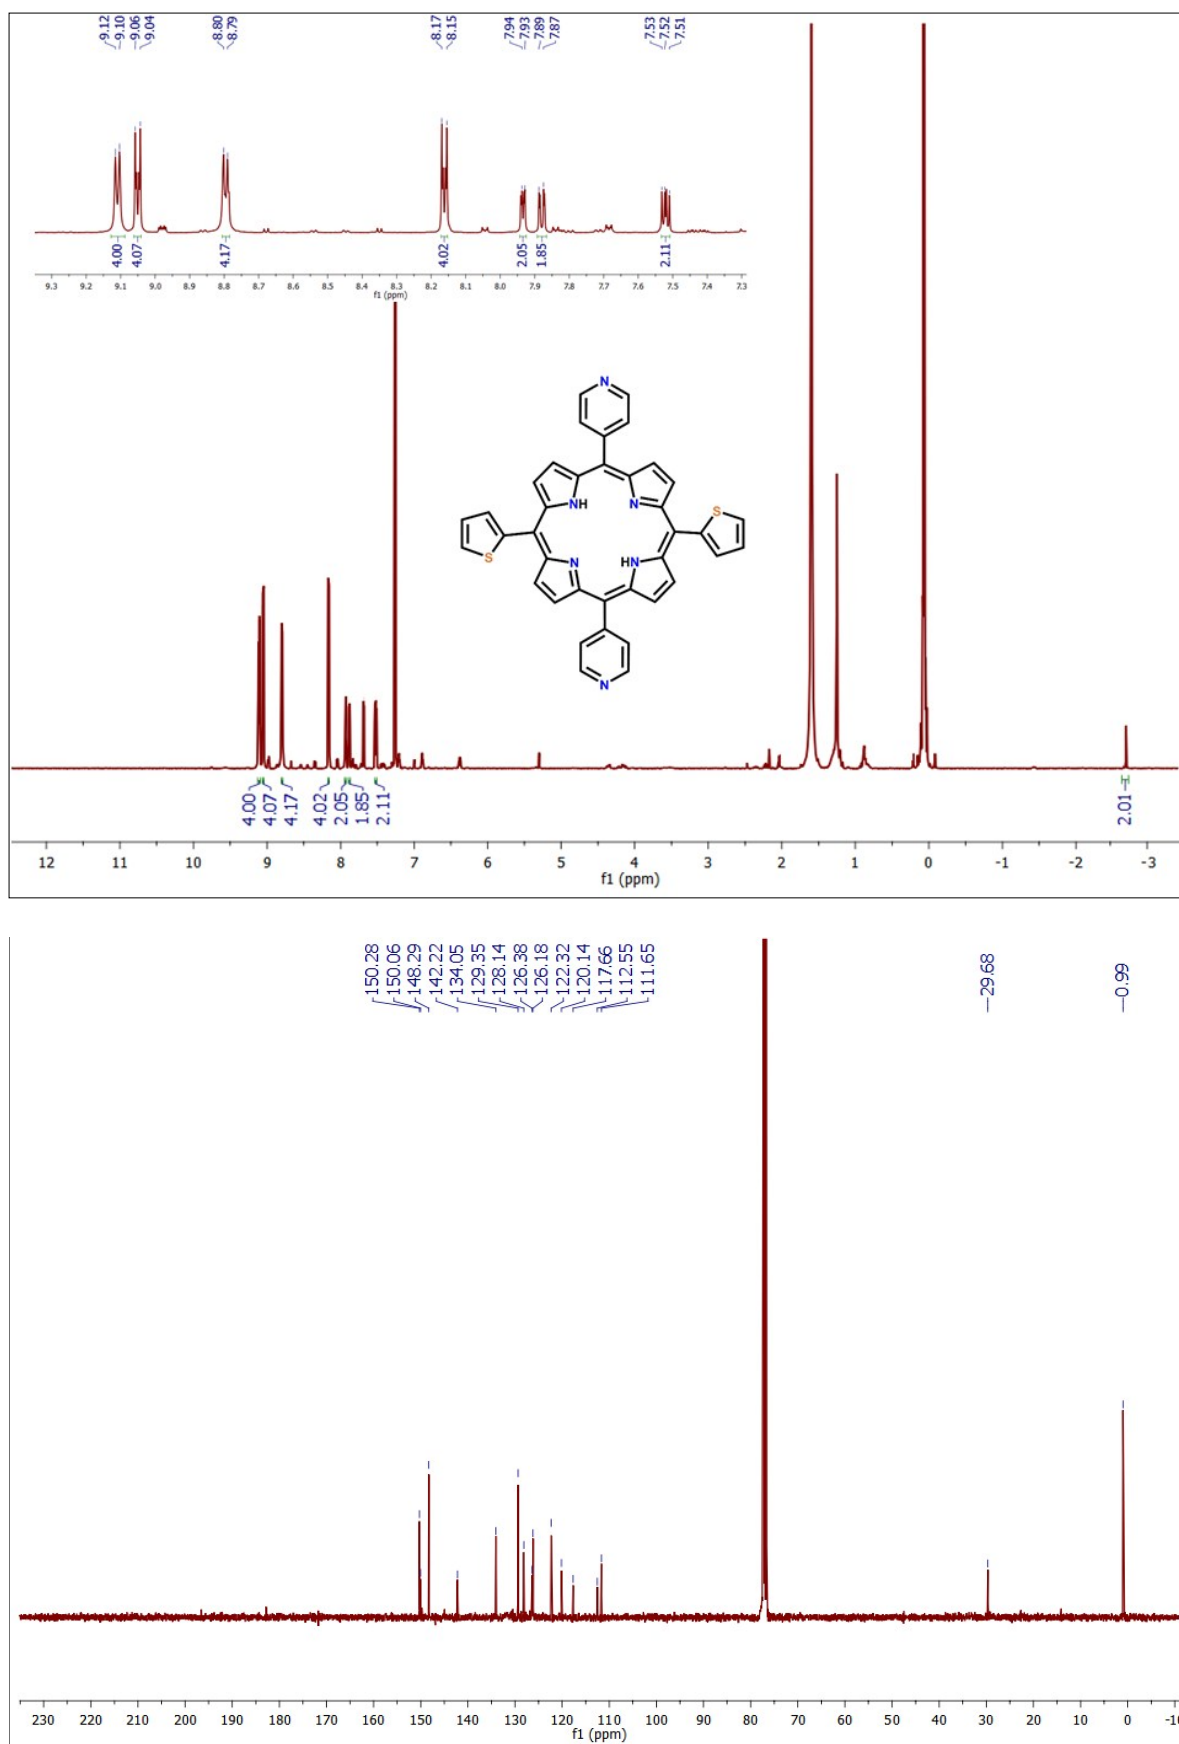

**Fig. S1**  $^1\text{H}$  NMR (400 MHz,  $\text{CDCl}_3$ , 25 °C) and  $^{13}\text{C}$  NMR (101 MHz,  $\text{CDCl}_3$ , 25 °C) of **1** (DPyDThP).

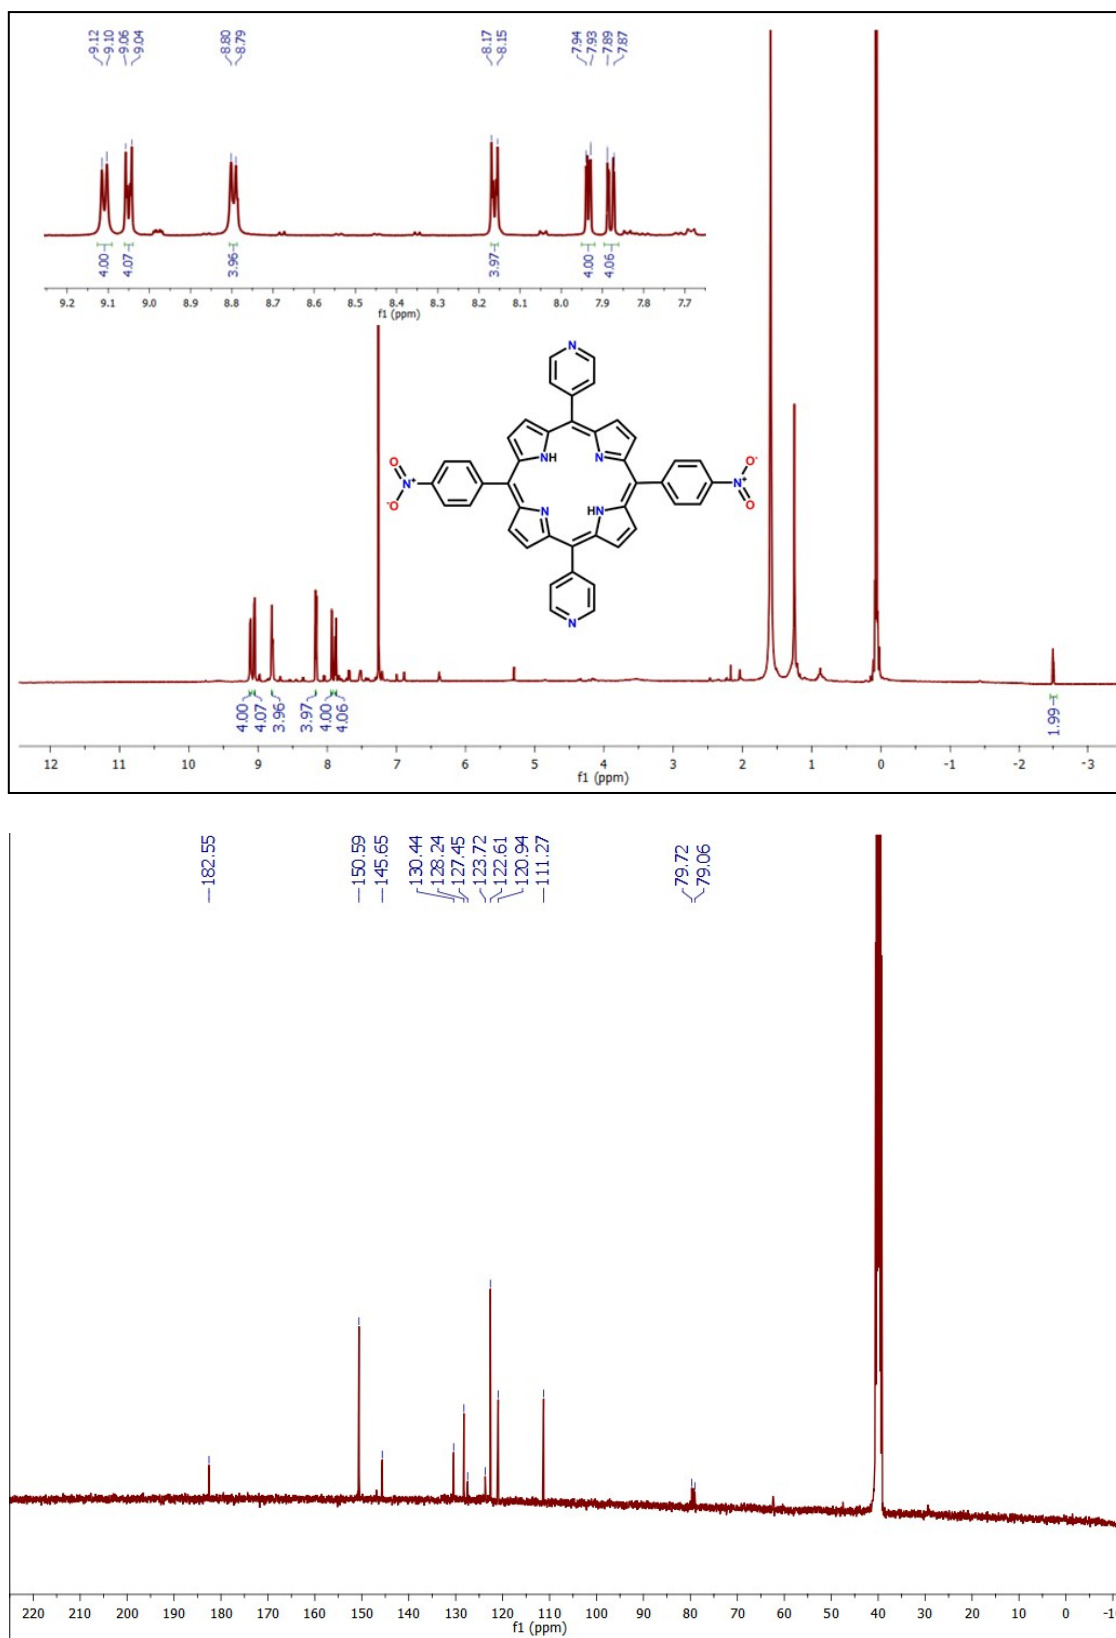

**Fig. S2** <sup>1</sup>H NMR (400 MHz, CDCl<sub>3</sub>, 25 °C) and <sup>13</sup>C NMR (101 MHz, DMSO-*d*<sub>6</sub>, 25 °C) of **2** (DPyDNO<sub>2</sub>P).

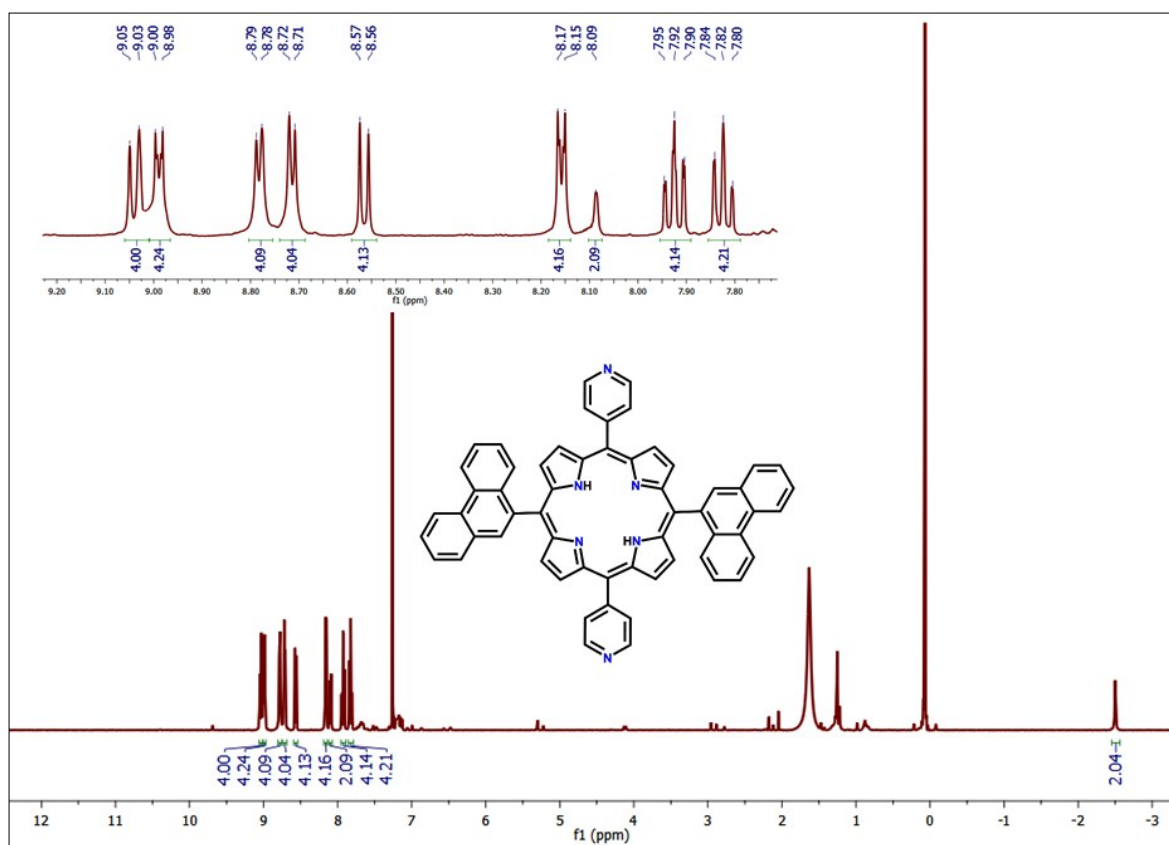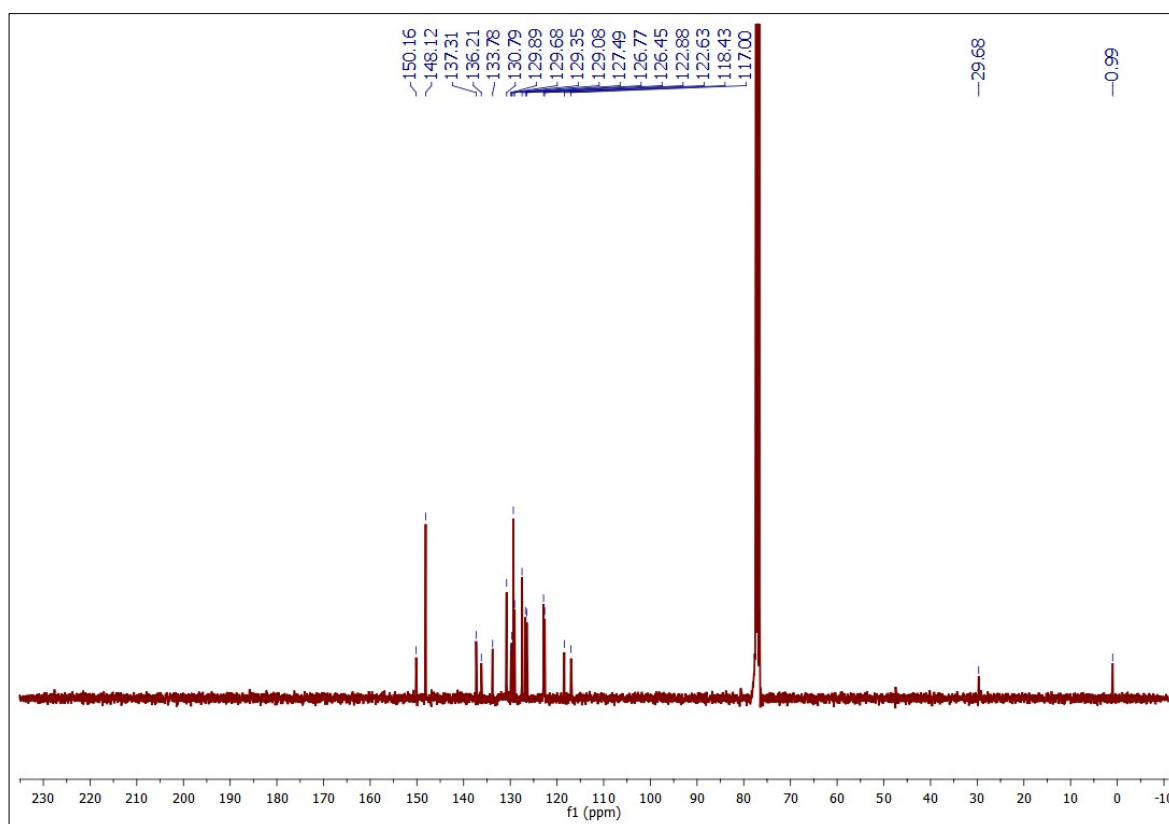

**Fig. S3** <sup>1</sup>H NMR (400 MHz, CDCl<sub>3</sub>, 25 °C) and <sup>13</sup>C NMR (101 MHz, CDCl<sub>3</sub>, 25 °C) of **3** (DPyDPhnP).

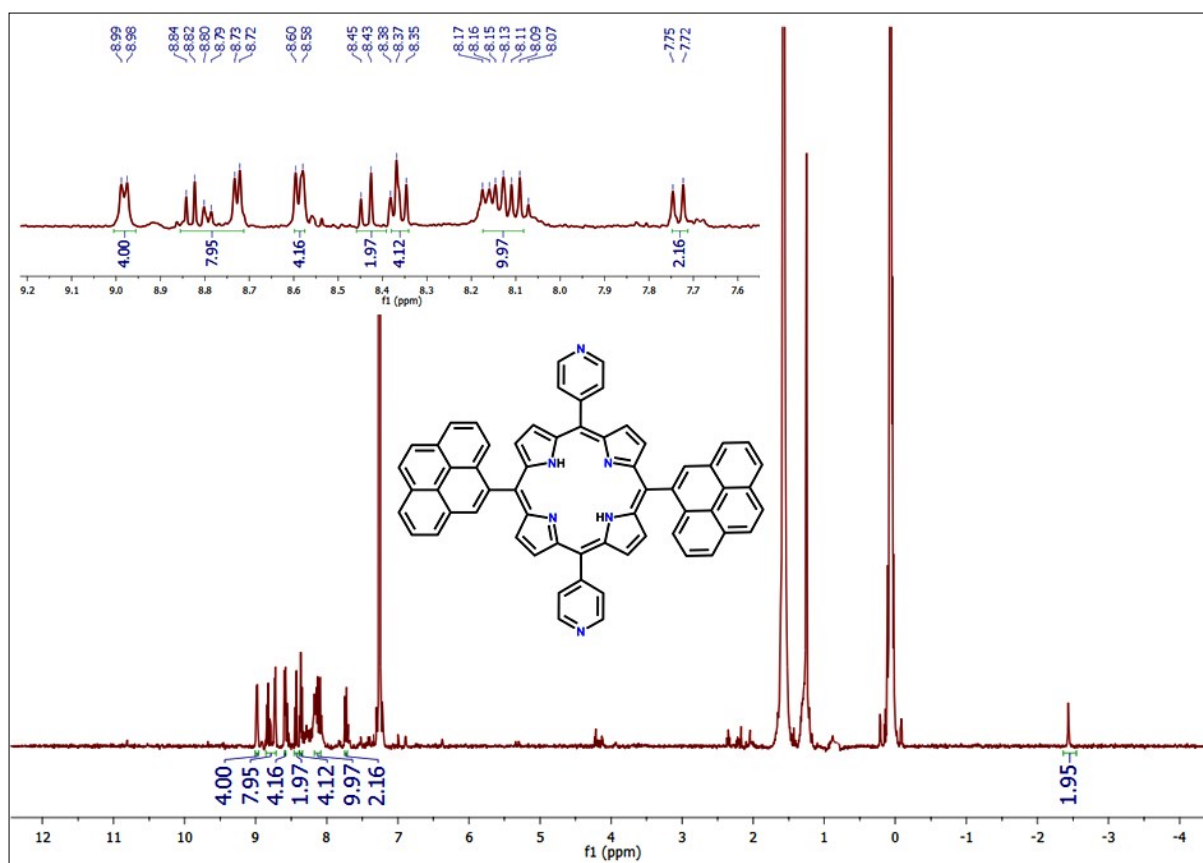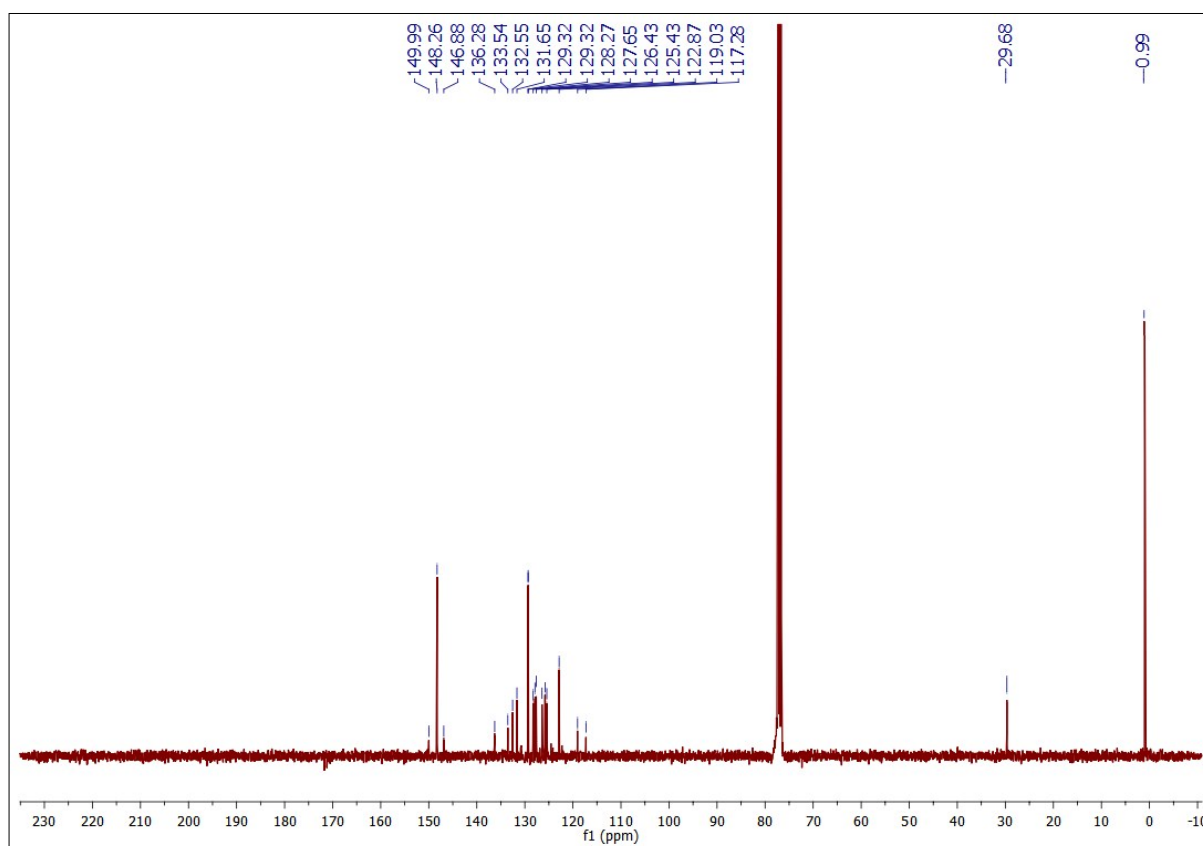

**Fig. S4** <sup>1</sup>H NMR (400 MHz, CDCl<sub>3</sub>, 25 °C) and <sup>13</sup>C NMR (101 MHz, CDCl<sub>3</sub>, 25 °C) of **4** (DPyDPyrP).

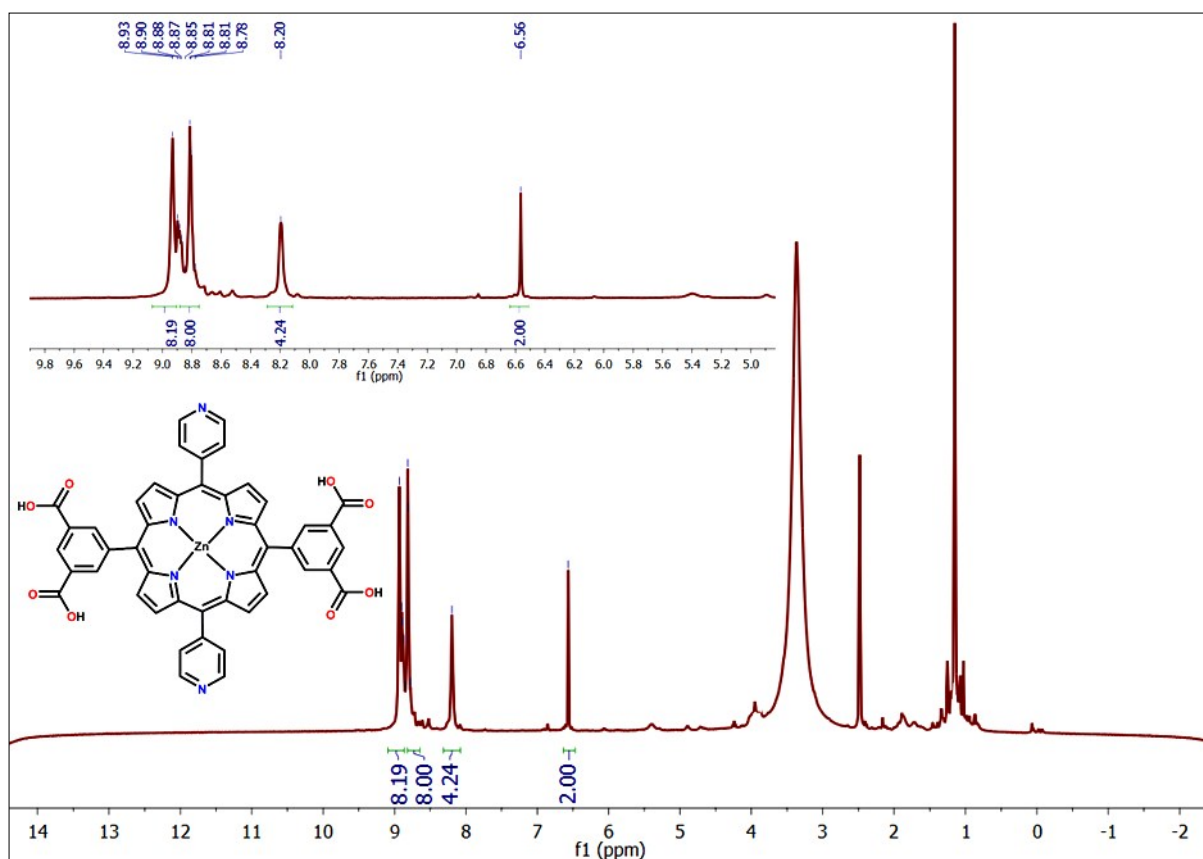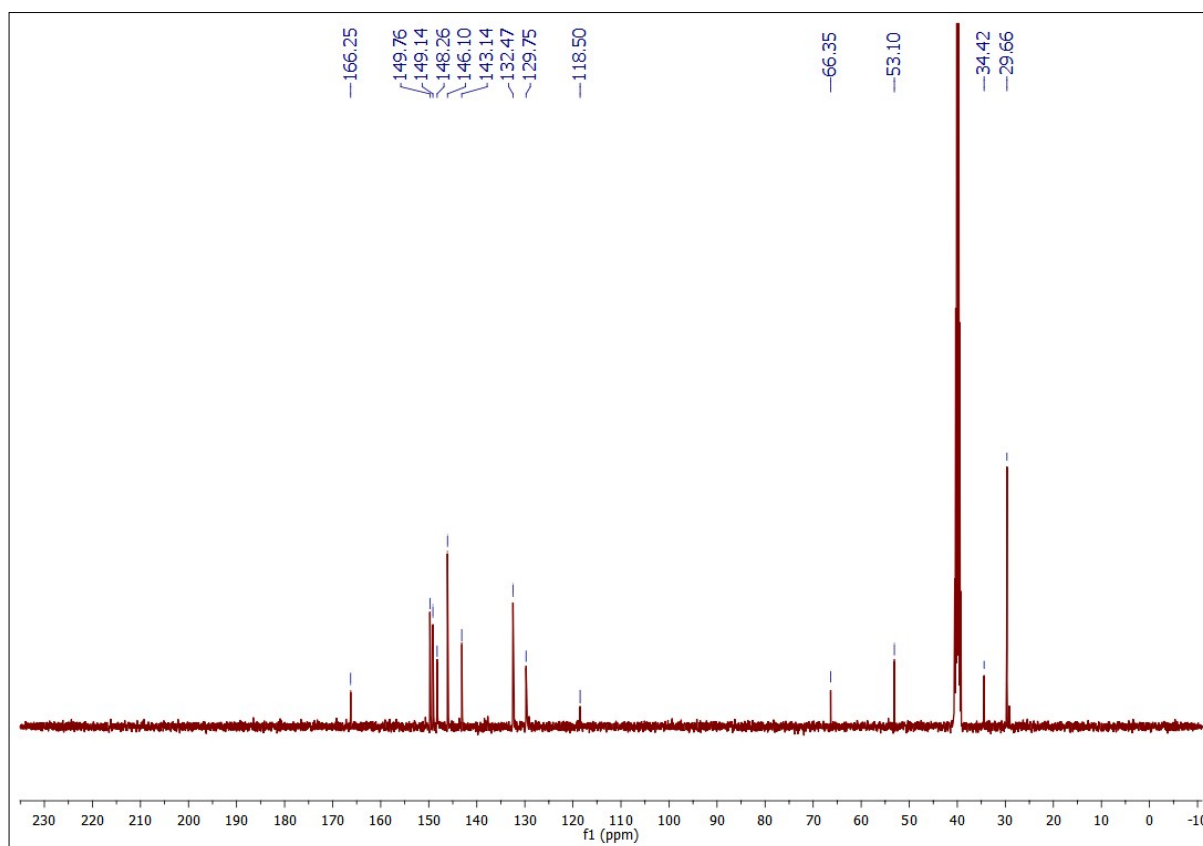

**Fig. S5** <sup>1</sup>H NMR (400 MHz, DMSO-*d*<sub>6</sub>, 25 °C) and <sup>13</sup>C NMR (101 MHz, DMSO-*d*<sub>6</sub>, 25 °C) of **5a** (DPyDTcZP).

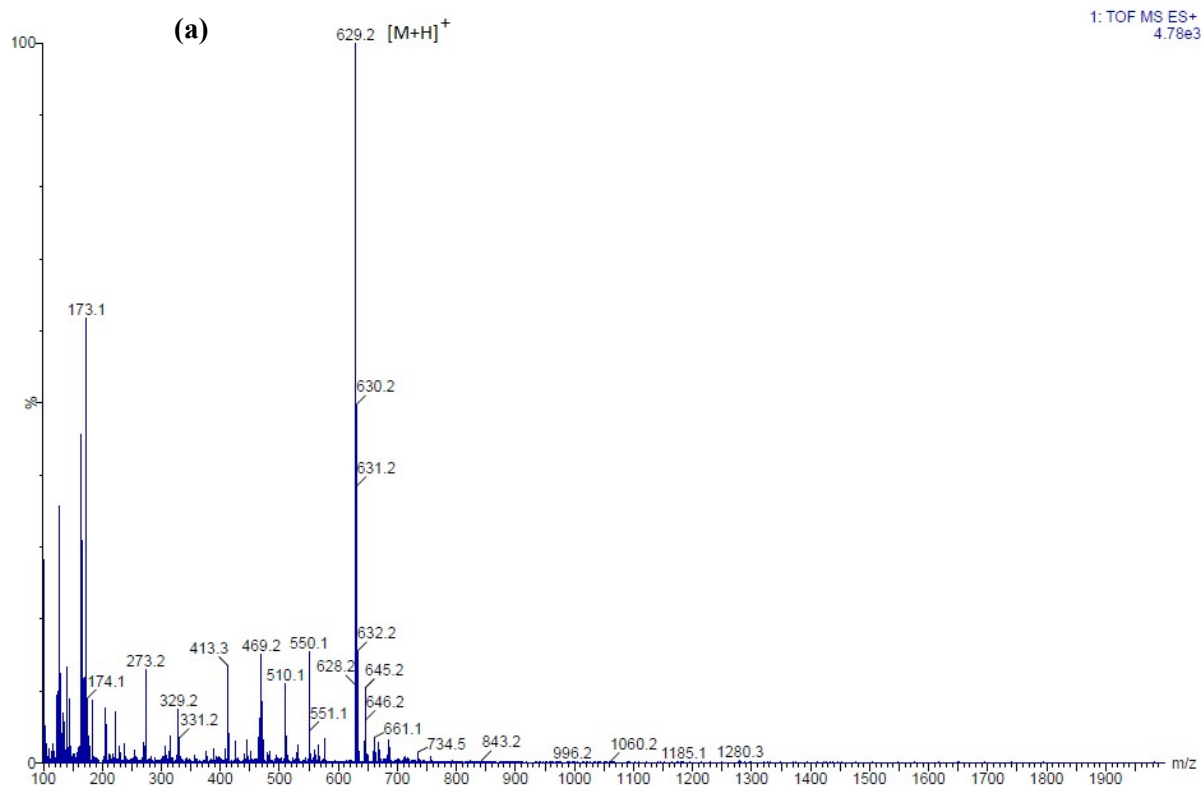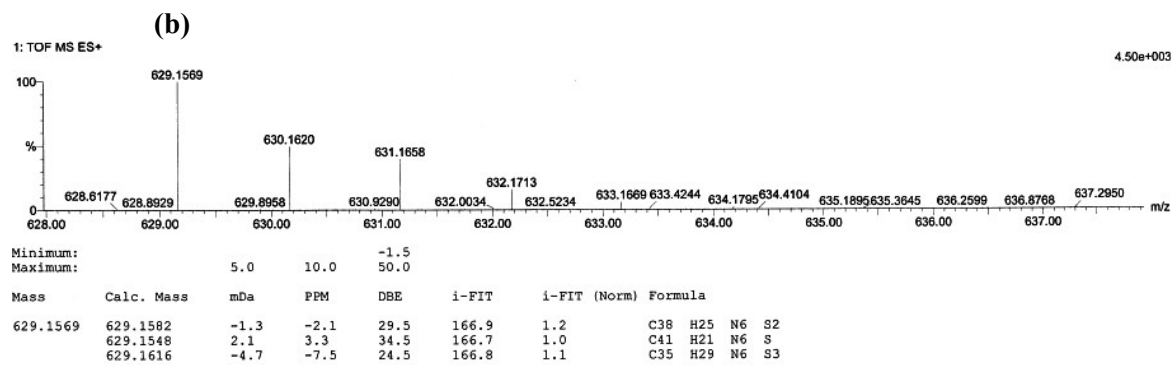

Fig. S6 (a) ESI-TOF-MS and (b) HRMS of 1.

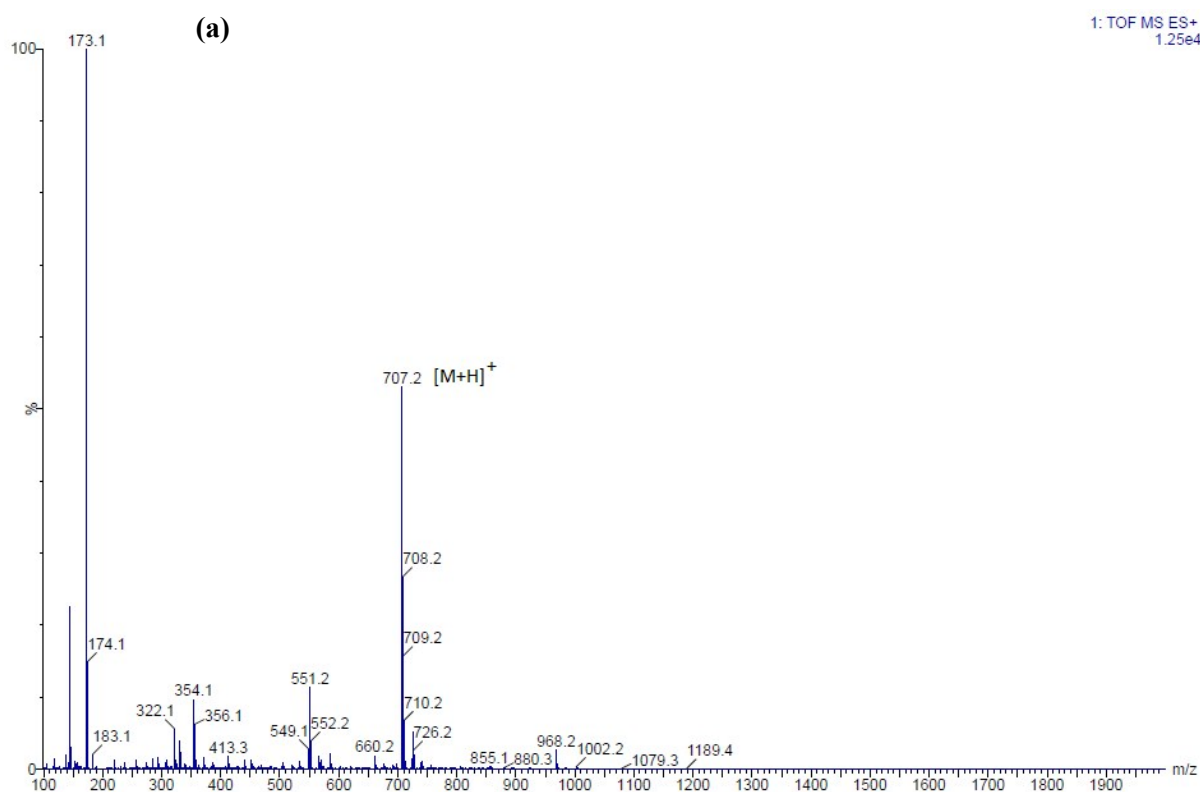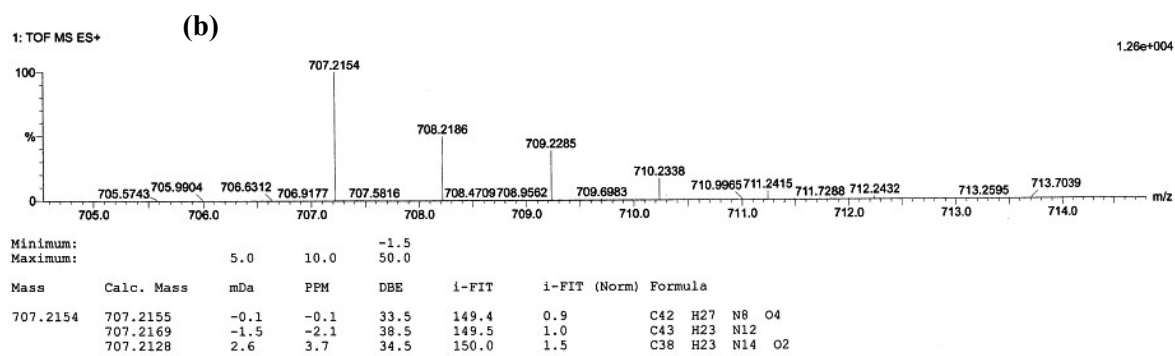

Fig. S7 (a) ESI-TOF-MS and (b) HRMS of 2.



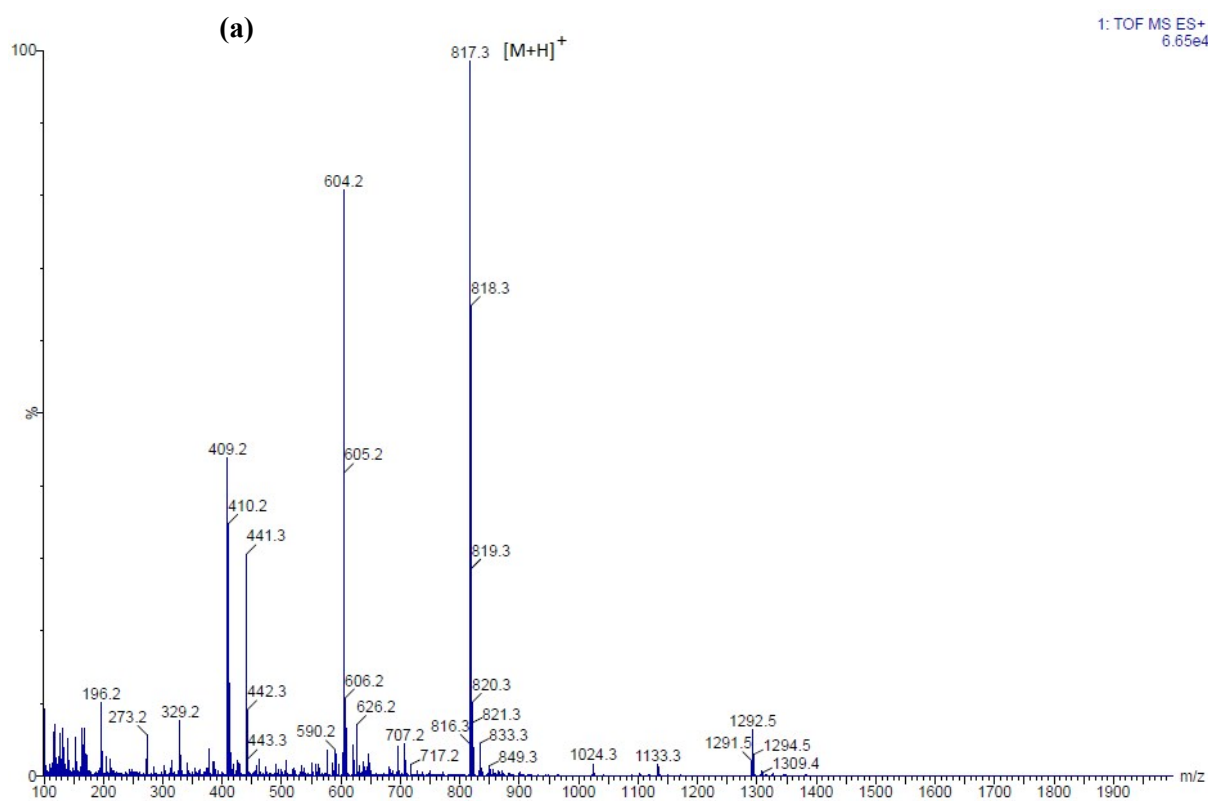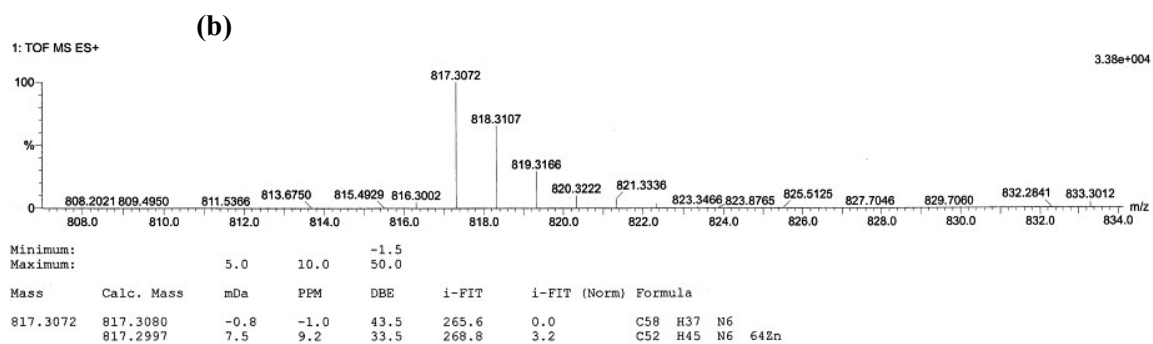

**Fig. S8** (a) ESI-TOF-MS and (b) HRMS of **3**.

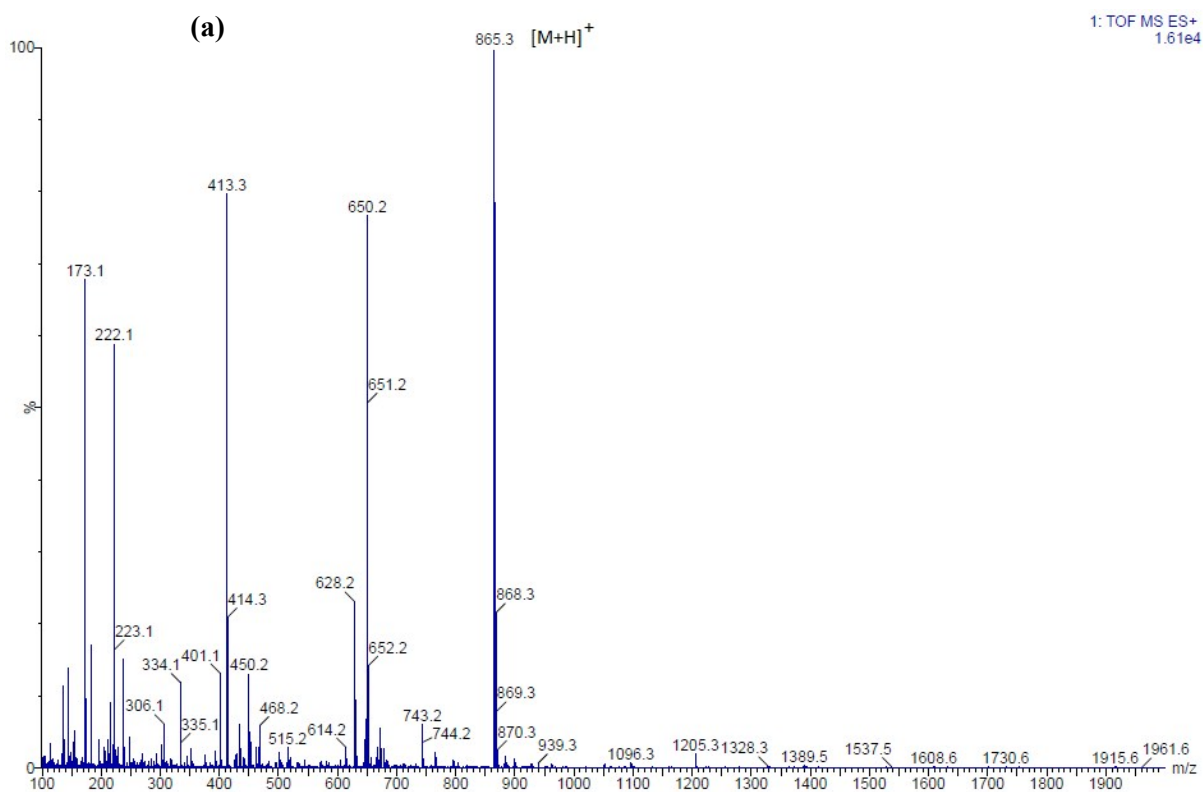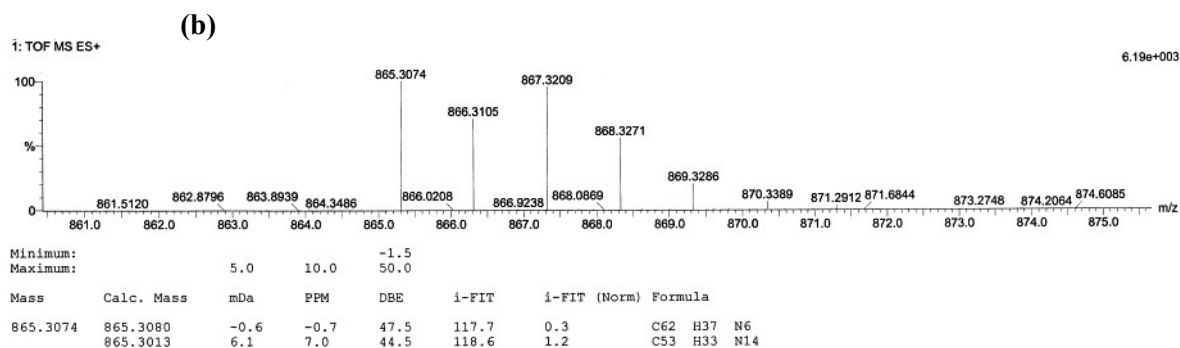

Fig. S9 (a) ESI-TOF-MS and (b) HRMS of 4.

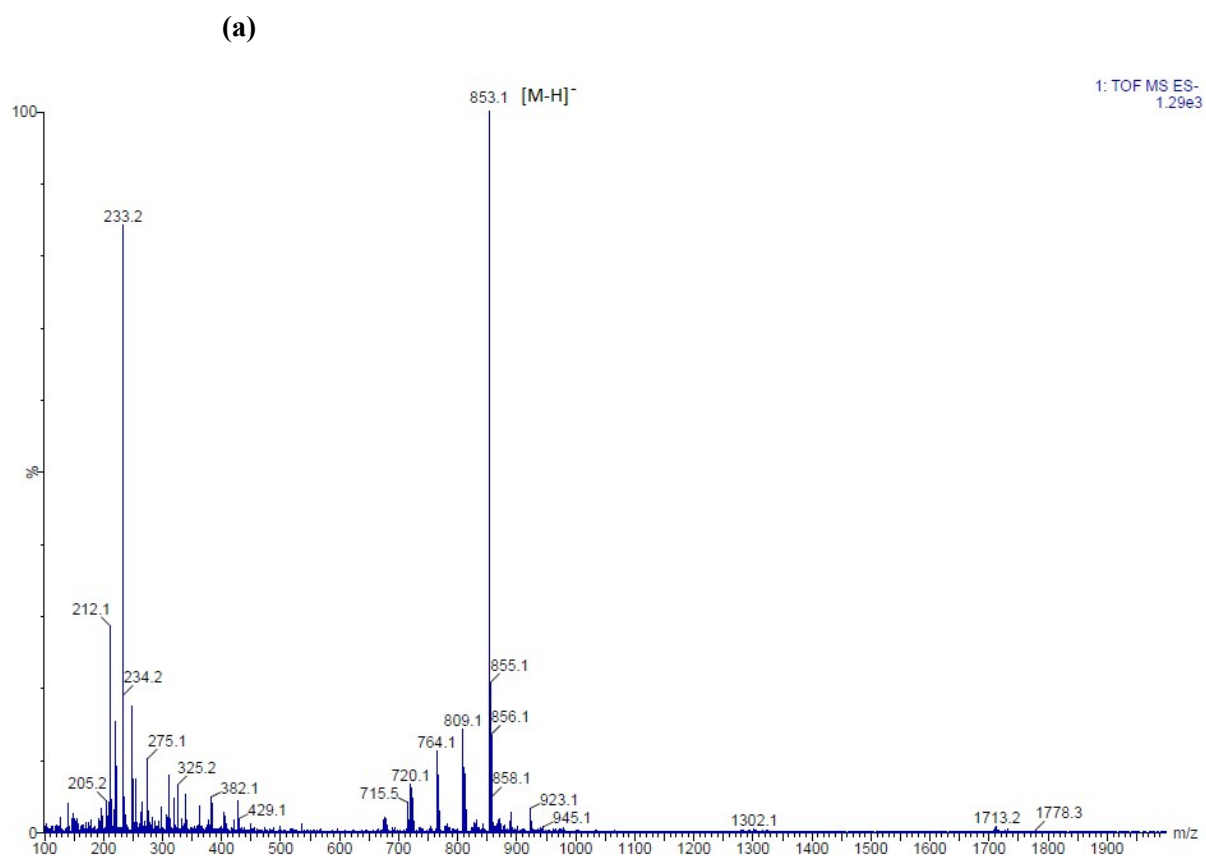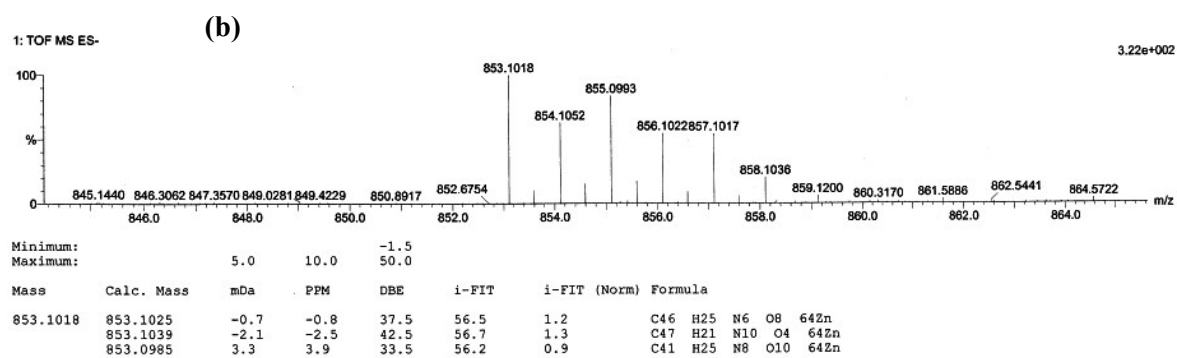

Fig. S10 (a) ESI-TOF-MS and (b) HRMS of 5.

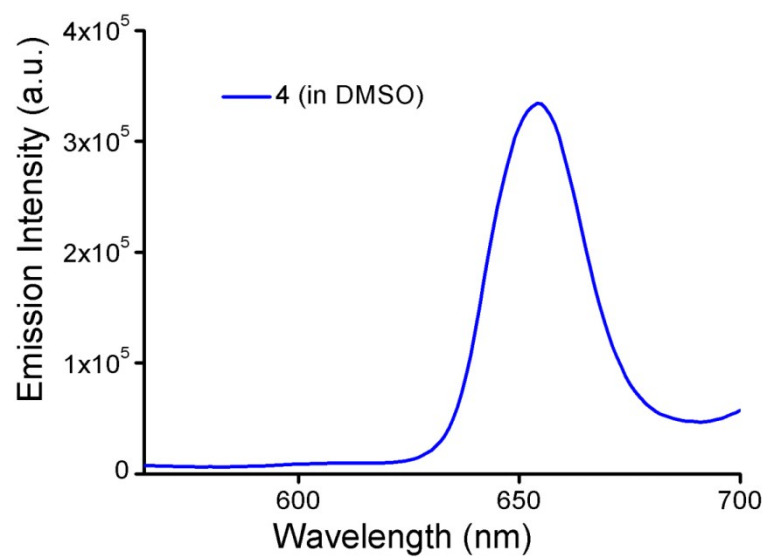

**Fig. S11** Emission spectra of porphyrin **4** in DMSO excited at 420 nm wavelength.

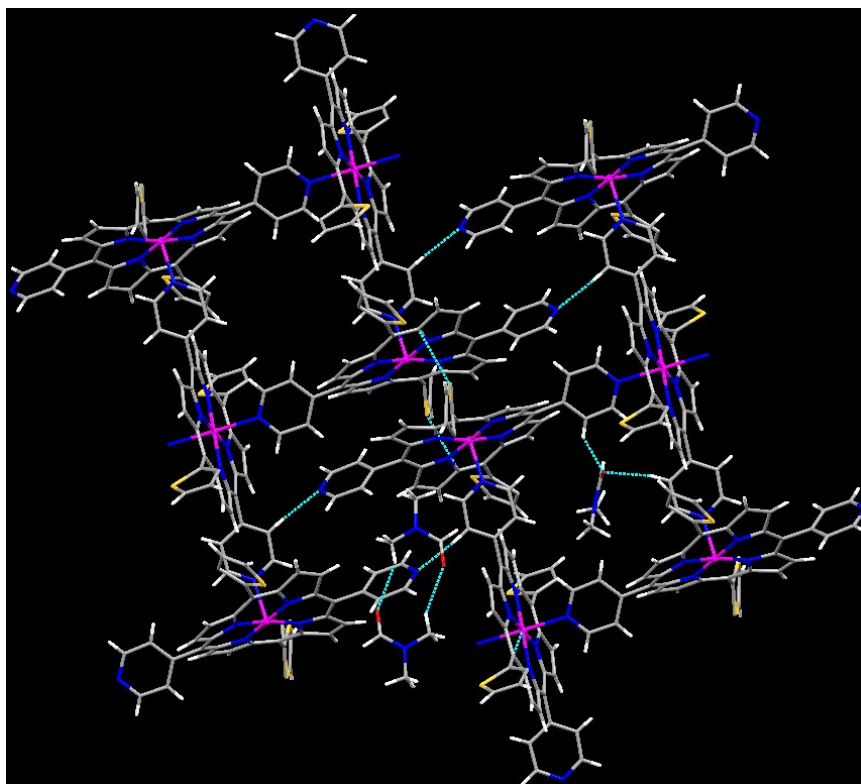

**Fig. S12** H-bonding interactions (represented by cyan dotted lines) observed in **1a**.

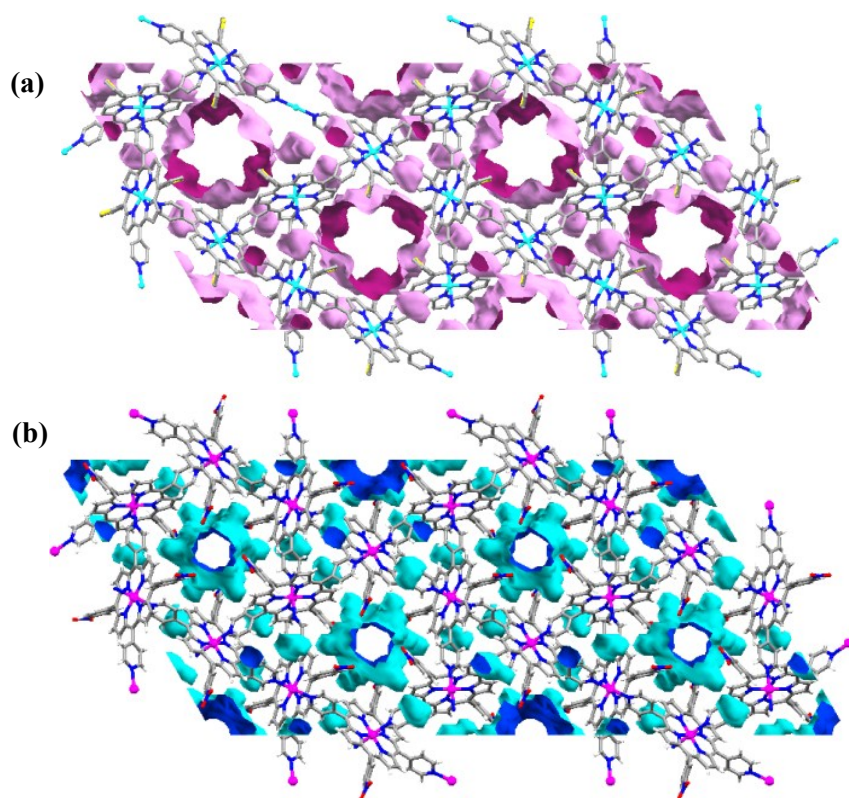

**Fig. S13** The Connolly surfaces of **1b** (a) and **2a** (b) showing slightly more open space in **1b** than in **2a**.

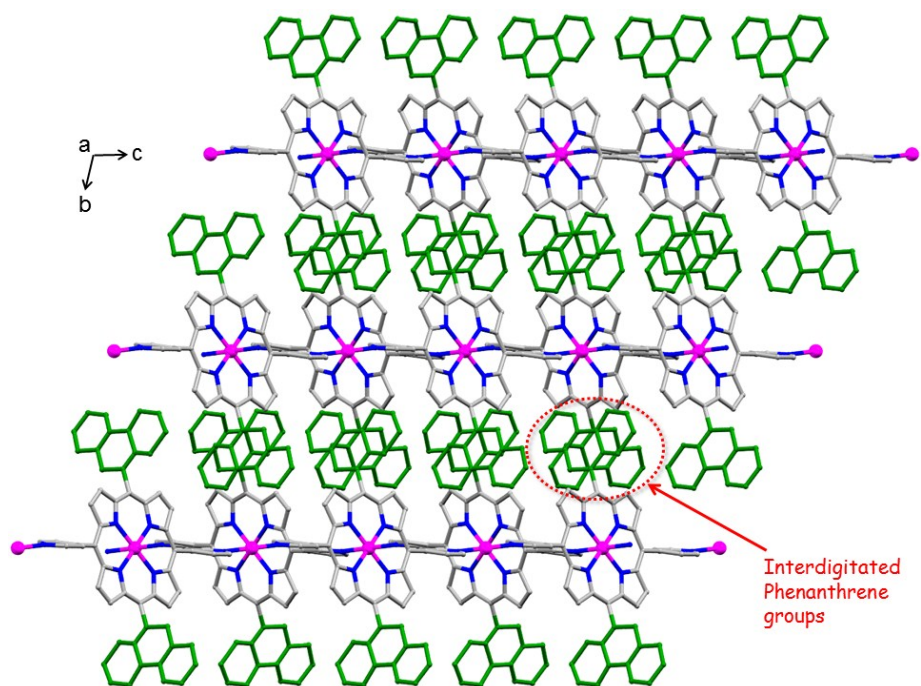

**Fig. S14** Pendant phenanthrene groups lining the upper and lower surfaces of the 2D layers in complex **3a**. Phenanthrene groups of one layer are interdigitated between those of the adjacent layers.

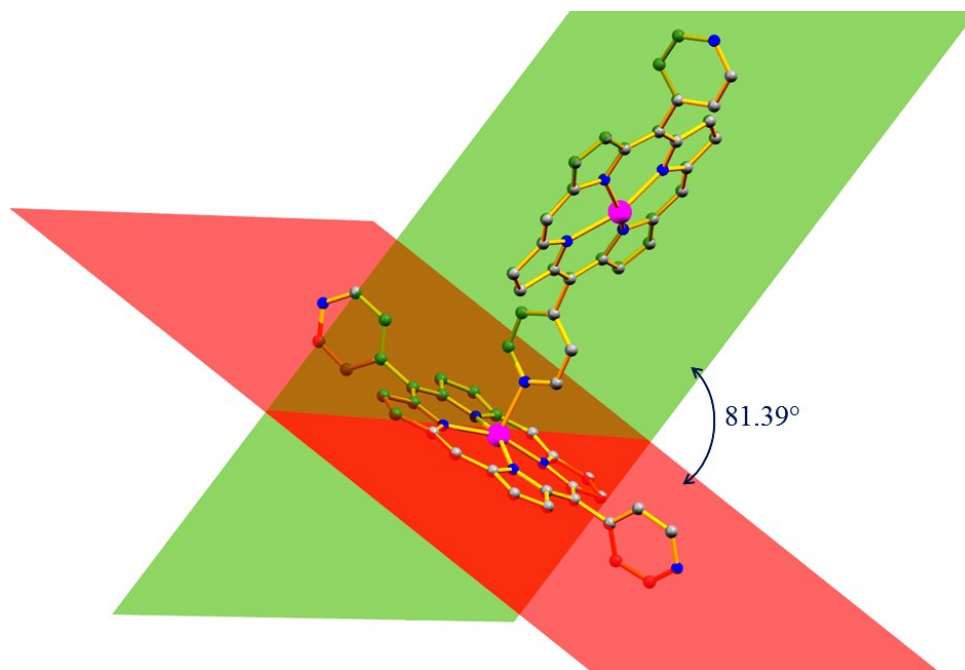

**Fig. S15** Dihedral angle between two neighbouring porphyrin macrocycles for complex **4a**. Pyrene substituents are removed for clarity.

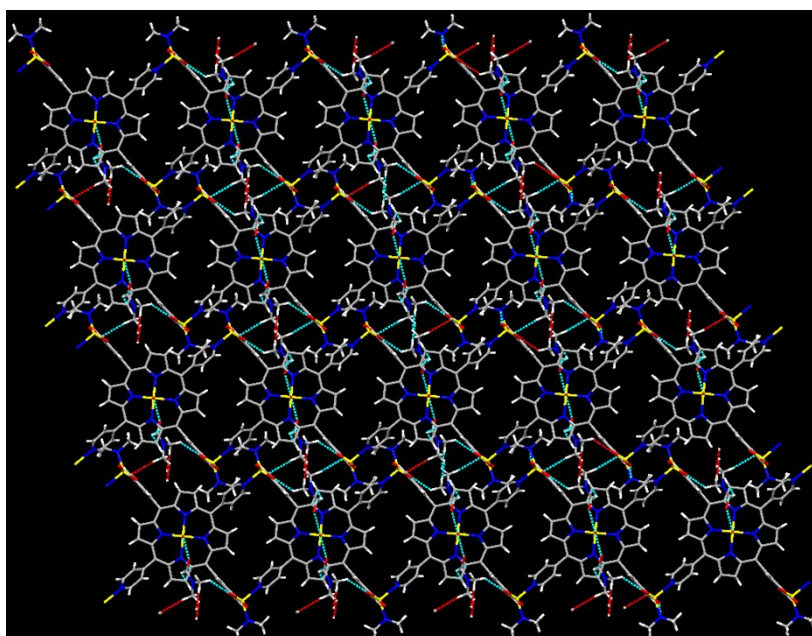

**Fig. S16** H-bonding interactions (shown as cyan dotted lines) found in complex **5a**. Colour code: yellow - Zn (to distinguish from the H-bonding) and others same as mentioned before.

**Table S1.** Summary of SHAPE analysis for complex **5a**.

| <i>Code</i>  | <i>Entry</i> | <i>Symmetry</i> | <i>Geometry</i>                 |
|--------------|--------------|-----------------|---------------------------------|
| PP-5         | 1            | D5h             | Pentagon                        |
| vOC-5        | 2            | C4v             | Vacant octahedron               |
| TBPY-5       | 3            | D3h             | Trigonal bipyramid              |
| <b>SPY-5</b> | <b>4</b>     | <b>C4v</b>      | <b>Spherical square pyramid</b> |
| JTBPY-5      | 5            | D3h             | Johnson trigonal bipyramid J12  |

| Structure [ML5 ] | PP-5 | vOC-5   | TBPY-5 | <b>SPY-5</b> | JTBPY-5             |
|------------------|------|---------|--------|--------------|---------------------|
| Zn               | ,    | 31.992, | 5.162, | 4.276,       | <b>3.716,</b> 5.094 |
